# Supplementary material for: Silencing Nfix rescues muscular dystrophy by delaying muscle regeneration
Source: PubMed Central journal article supplement (PMC5651883; doi:10.1038/s41467-017-01098-y), 2017-10-20
Supplement: 41467_2017_1098_MOESM1_ESM.pdf [file 41467_2017_1098_MOESM1_ESM.pdf]

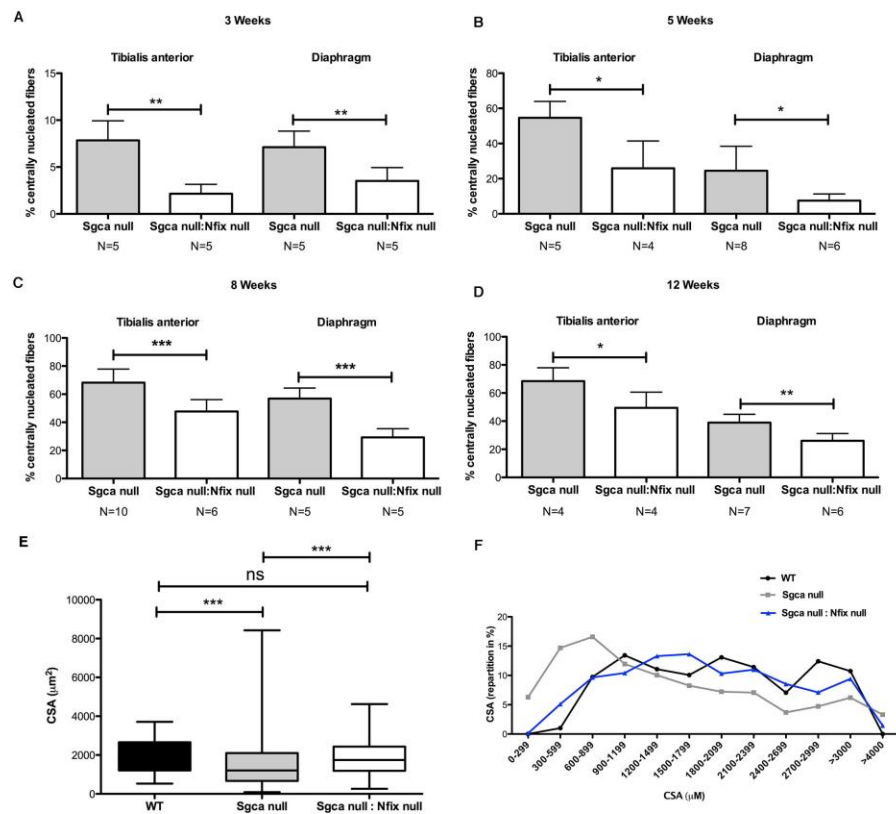

**Supplementary Fig.1. The histopathological signs of the disease are improved in dystrophic mice lacking *Nfix*. Related to Fig. 1 and 2.**

**(A-D)** Percentage of centrally nucleated myofibers in *Tibialis anterior* and Diaphragm muscles of *Sgca* null and *Sgca* null:*Nfix* null mice at 3 **(A)**, 5 **(B)**, 8 **(C)** and 12 **(D)** weeks; N are indicated in figure; mean±SD; *t*-Test, \**P*<0,05; \*\**P*<0,01; \*\*\**P*<0,001;

**(E, F)** Myofiber cross sectional area distribution at 8 weeks; N=298 WT, 1273 *Sgca* null and 902 *Sgca* null:*Nfix* null fibers. **E**: Mean±whiskers from min to max; one way ANOVA with Bonferroni post test; \*\*\**P*<0,001; ns: non significant.

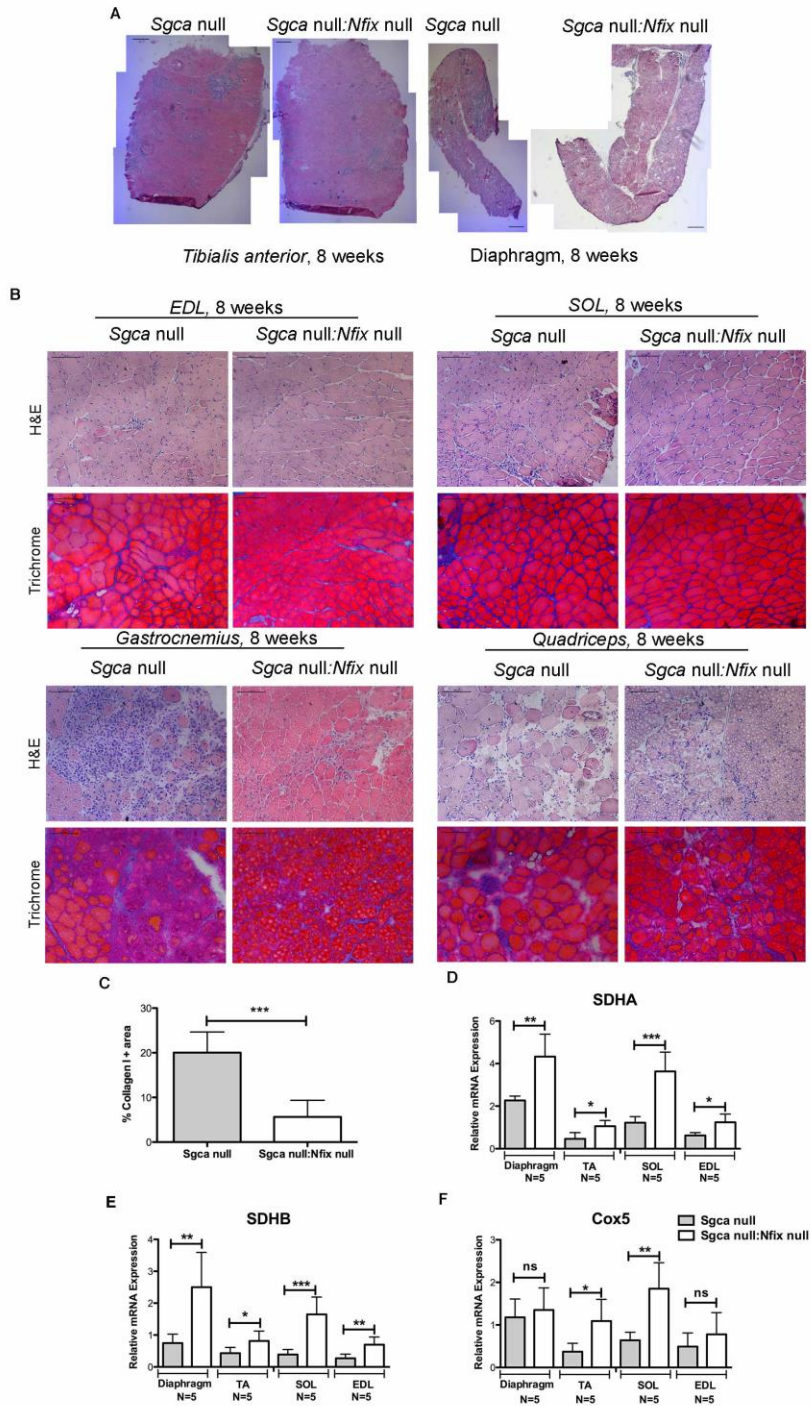

**Supplementary Fig.2. Amelioration of different muscle types in dystrophic mice lacking *Nfix*; Related to Fig.2**

(A) Entire H&E TA and Diaphragm muscle section reconstructions from *Sgca* null (N=23) and *Sgca* null:*Nfix* null (N=12) mice at 8 weeks;

(B) H&E and Trichrome stainings of *EDL*, *Soleus (SOL)*, *Gastrocnemius* and *Quadriceps* muscles from *Sgca* null (N=3) and *Sgca* null:*Nfix* null (N=3) mice at 8 weeks. Scale bars 100 $\mu$ m;

(C) Quantification of Collagen I positive areas in *Tibialis anterior* muscle sections from *Sgca* null (N=5) and *Sgca* null:*Nfix* null (N=5) mice at 8 weeks; Mean±SD *t*-Test, \*\*\*P<0,001;

(D, E, F) Real Time PCR showing expression of SDH-A/B (D, E) and Cox5 (F) in *Sgca* null and *Sgca* null:*Nfix* null muscles at 3 weeks. N are indicated in figure. Mean±SD, *t*-Test, \*P<0,05; \*\*P<0,01; \*\*\*P<0,001; ns: non significant.

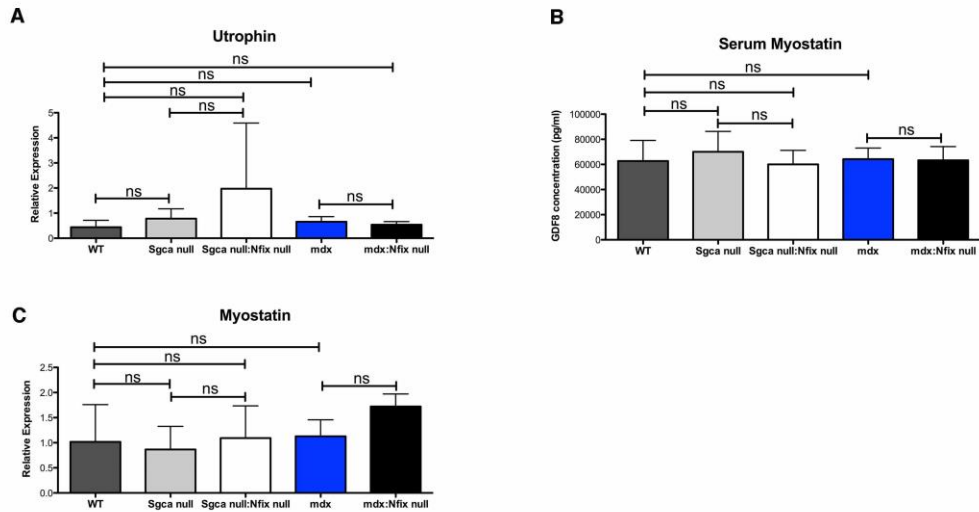

**Supplementary Fig.3 Utrophin and Myostatin modulation is not at the basis of the phenotypic amelioration of the mdx:Nfix null and Sgca:Nfix null dystrophic mice; Related to Fig.2 and Fig.6.**

(A) Real Time PCR analysis of *Utrophin* expression on N=4 WT, N=8 *Sgca* null, N=8 *Sgca* null:*Nfix* null, N=5 *MDX* and N=4 *MDX:Nfix* null gastrocnemius muscles. Mean±SD; one way ANOVA with Bonferroni post test; ns: non significant.

(B) Real Time PCR analysis of Myostatin expression on N=4 WT, N=8 *Sgca* null, N=8 *Sgca* null:*Nfix* null, N=5 *MDX* and N=4 *MDX:Nfix* null gastrocnemius muscles. Mean±SD; one way ANOVA with Bonferroni post test; ns: non significant.

(C) ELISA assay to detect Myostatin in serum on N=4 WT, N=7 *Sgca* null, N=7 *Sgca* null:*Nfix* null, N=5 *MDX* and N=4 *MDX:Nfix* null mice. Mean±SD; one way ANOVA with Bonferroni post test; ns: non significant.

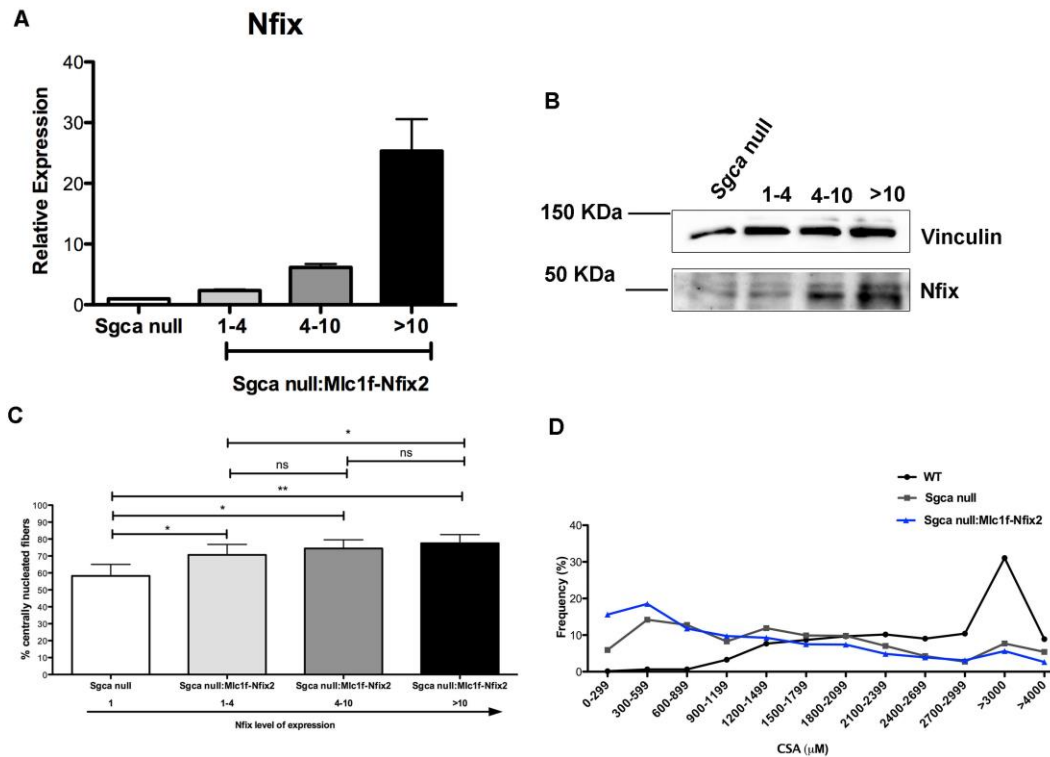

**Supplementary Fig.4. The exacerbation of the dystrophic phenotype in the *Sgca* null:*Mlc1f-Nfix2* mice correlates with *Nfix* levels. Related to Fig.5.**

(A) Real time PCR analysis of *Nfix* expression in *Sgca* null and *Sgca* null:*Mlc1f-Nfix2* mice subdivided in three different subclasses based on *Nfix* expression levels

(B) Western blot validation of *Nfix* overexpression in the three different subclasses of *Sgca* null:*Mlc1f-Nfix2* mice compared to *Sgca* null mice.

(C) Percentage of centrally nucleated myofibers in *Tibialis anterior* (TA) muscle sections from *Sgca* null and *Sgca* null:*Mlc1f-Nfix2* mice sub-classified based on *Nfix* overexpression levels at 8 weeks of age; N=5 *Sgca* null, 8 class (1-4), 3 class (4-10) and 7 class (>10) *Sgca* null:*Mlc1f-Nfix2* mice. Mean $\pm$ SD, *t*-Test, \*P<0,05; \*\*P<0,01; ns: non significant.

(D) Myofiber cross sectional area distribution at 8 weeks of age; N=799 fibers for WT, 908 for *Sgca* null and 1026 for *Sgca* null:*Mlc1f-Nfix2* mice.

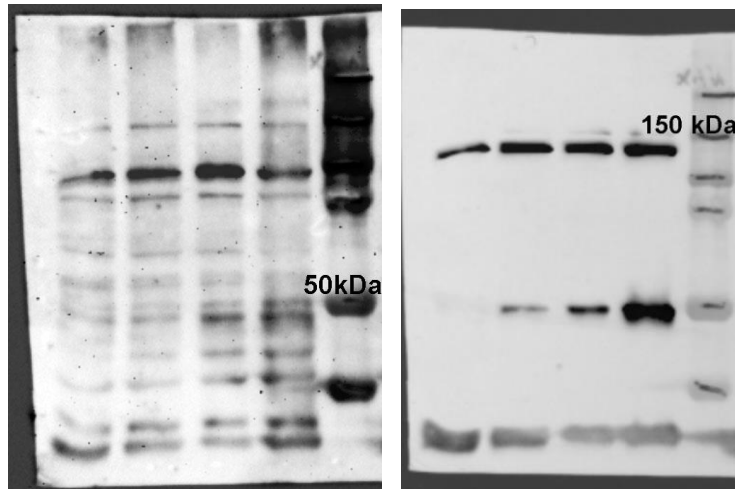

**Supplementary Fig.5. Uncropped scans of Western Blots in Supplementary Fig.4**

Uncropped Scans of Nfix (left panel) and Vinculin (right panel) western blots shown in Supplementary Fig.4
